# Supplementary material for: Long-Term Outdoor Testing of Perovskite Mini-Modules: Effects of FACl Additives
Source: MDPI journal article supplement (doi:10.3390/en16062608), 2023-03-09
Supplement: s1 [file s1]

## Supplementary Material

Table S1. Efficiencies from all modules under study prior outdoor exposure.

| Module    | Efficiency (%) |
|-----------|----------------|
| Module A1 | 9.74           |
| Module A2 | 8.45           |
| Module A3 | 14.34          |
| Module B1 | 9.73           |
| Module B2 | 15.72          |
| Module B3 | 13.29          |

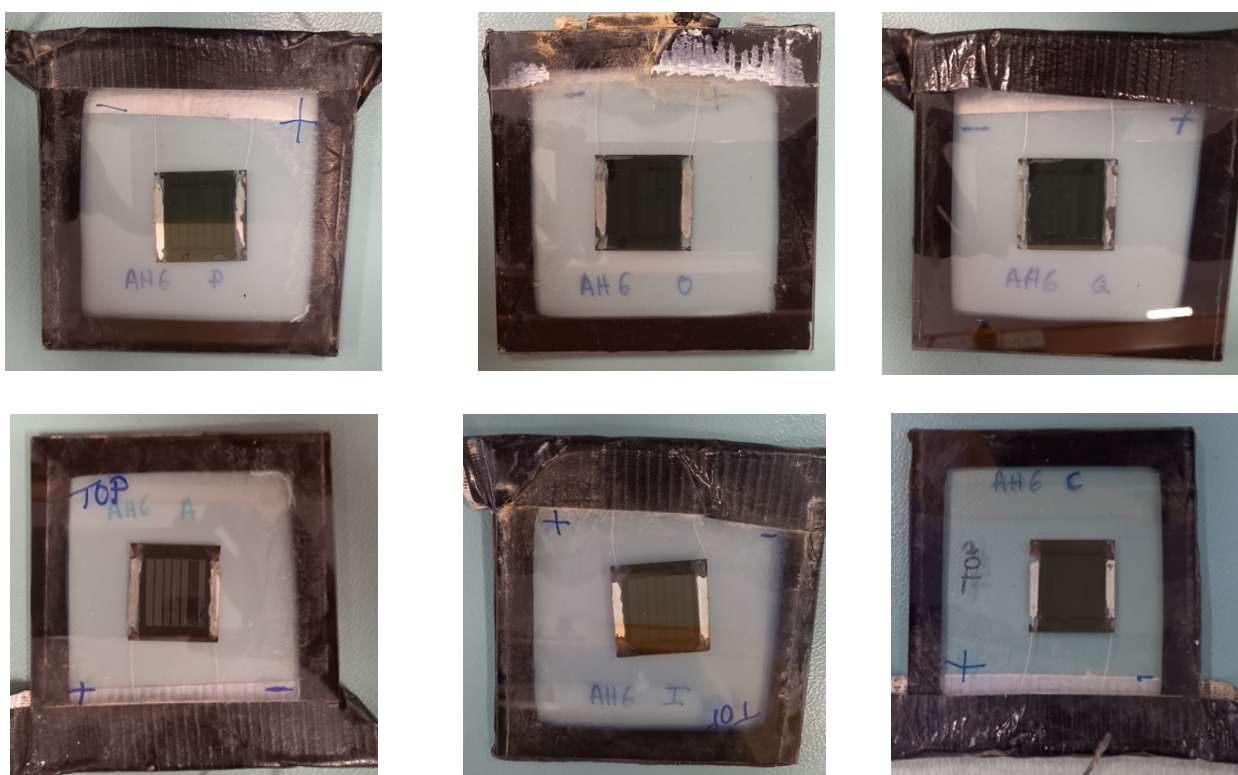

Figure S1. Pictures of the tested samples just after outdoor testing. Degradation due to humidity ingress is not obtained in the samples.

**Table S2. Open-circuit voltage coefficient for each week of outdoor exposure and for all type A modules.**

| <b>Week of exposure</b> | <b>Module A2</b>         | <b>Module A3</b>         | <b>Module A1</b>    |
|-------------------------|--------------------------|--------------------------|---------------------|
| <b>1</b>                | -0.0138                  | -0.01734                 | -0.0161             |
| <b>2</b>                | -0.01373                 | -0.01615                 | -0.00762            |
| <b>4</b>                | -0.01309                 | -0.0134                  | -0.00152            |
| <b>5</b>                | -0.01335                 | -0.01593                 | 8.04826E-4          |
| <b>6</b>                | -0.01061                 | -0.01131                 | 3.49785E-4          |
| <b>7</b>                | -0.00707                 | -0.00378                 | -0.00699            |
| <b>9</b>                | -0.00918                 | -0.0067                  | -0.00873            |
| <b>10</b>               | -0.01275                 | -0.0123                  | -0.00801            |
| <b>14</b>               | -0.00617                 | -0.01185                 | -0.00711            |
| <b>Mean</b>             | <b>-0.01108<br/>V/°C</b> | <b>-0.01208<br/>V/°C</b> | <b>-0.0061 V/°C</b> |

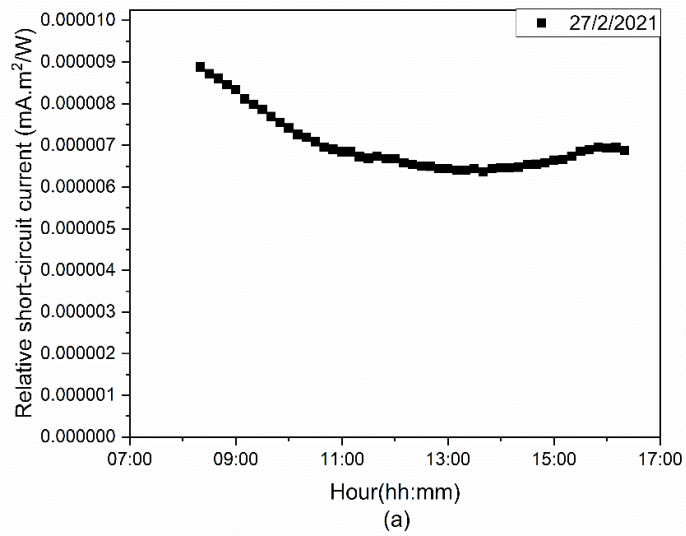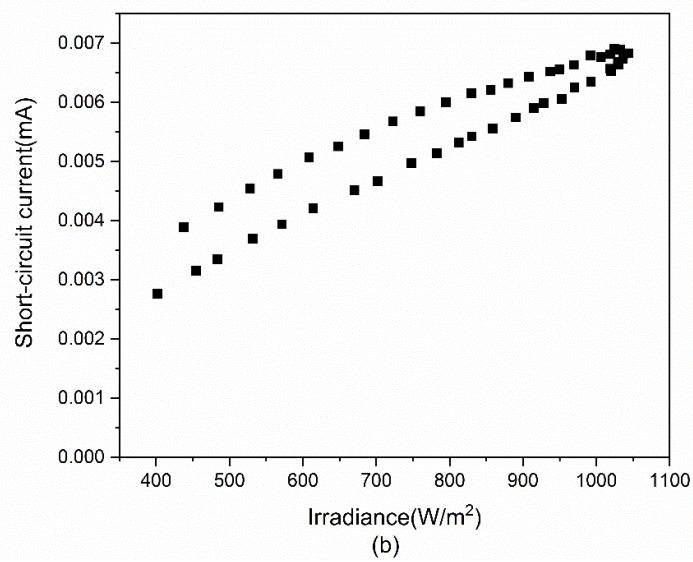

**Figure S2. (a) Relative short-circuit current over time for the 27<sup>th</sup> of February 2021 and (b) Short-circuit current against irradiance on the same day. Results correspond to Module A1.**

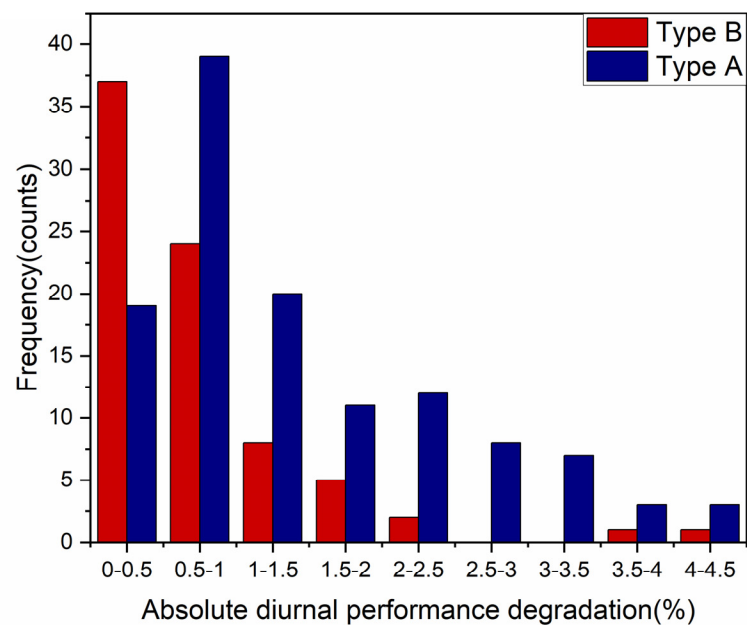

**Figure S3. Frequency of occurrence for the absolute diurnal performance degradation in the range 0%-4.5%.**

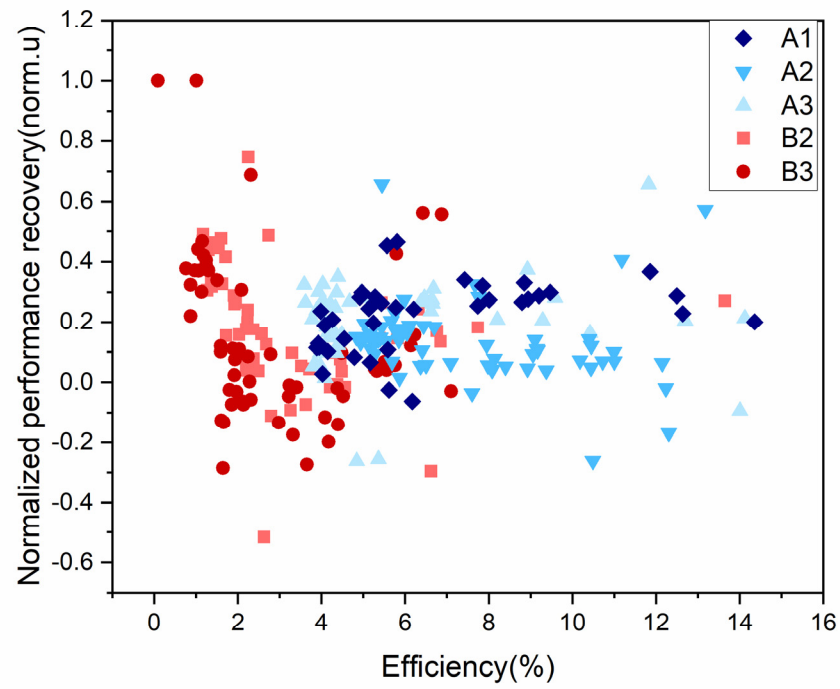

Figure S4. Normalized performance recovery against efficiency for all modules under studied.

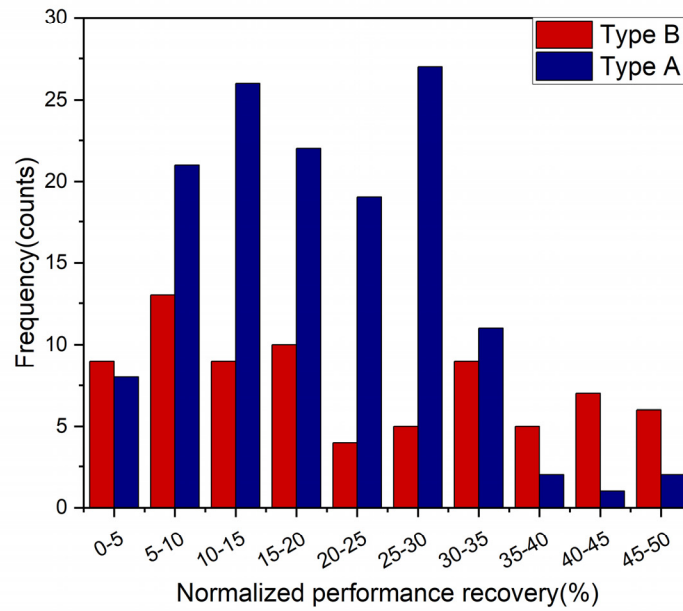

**Figure S5.** Frequency of occurrence for the normalized performance recovery in the range 0%-50%. Normalized performance recovery values were separated into bins of 5%.

**Table S3.** Temperature of the two main hotspots within modules before and after outdoor exposure.

| #<br>Module | Hotspot #1 Average Temperature |         |                 | Hotspot #2 Average Temperature |         |                 |
|-------------|--------------------------------|---------|-----------------|--------------------------------|---------|-----------------|
|             | Before                         | After   | Location        | Before                         | After   | Location        |
| Module A2   | 15.41mK                        | 23.87mk | Interconnection | 11.26mK                        | 11.75mK | Inside cell     |
| Module A3   | -                              | 14.31mK | Interconnection | -                              | -       | -               |
| Module A1   | 30.07mK                        | 32.09mK | Inside cell     | -                              | -       | -               |
| Module B3   | 40.17mK                        | 29.26mK | Inside cell     | 27.56mK                        | 18.59mK | Interconnection |
| Module B2   | 26.33mK                        | 21.55mk | Interconnection | 24.36mK                        | 13.37mK | Interconnection |
